# Supplementary material for: Influence of Magnetic Fields on Magneto-Aerotaxis
Source: PLoS One. 2014 Jul 1;9(7):e101150. doi: 10.1371/journal.pone.0101150 (PMC4077765; doi:10.1371/journal.pone.0101150)
Supplement: Equation S1 — Degrees of freedom adjusted R-square. Ny is the number of data points; Np is the number of fitting parameters; y(x) is the data; is the mean of the data; and f(x) is the model. (DOCX) [file pone.0101150.s011.docx]

Supplementary Equation S1

# Influence of Magnetic Fields on Magneto-Aerotaxis Bands

Mathieu Bennet1; Aongus McCarthy2; Dmitri Fix1; Matthew R. Edwards3; Felix Repp1; Peter Vach1; John W. C. Dunlop1; Metin Sitti3; Gerald S. Buller2; Stefan Klumpp4; Damien Faivre1*

Supplementary Equation S1
